# Supplementary material for: RAG1 and RAG2 non-core regions are implicated in leukemogenesis and off-target V(D)J recombination in BCR-ABL1-driven B-cell lineage lymphoblastic leukemia
Source: eLife journal article supplement (doi:10.7554/elife.91030), 2023-11-01

Figure 2—figure supplement 1—source data 2

Original file for the PCR analysis in Figure 2—figure supplement 1A

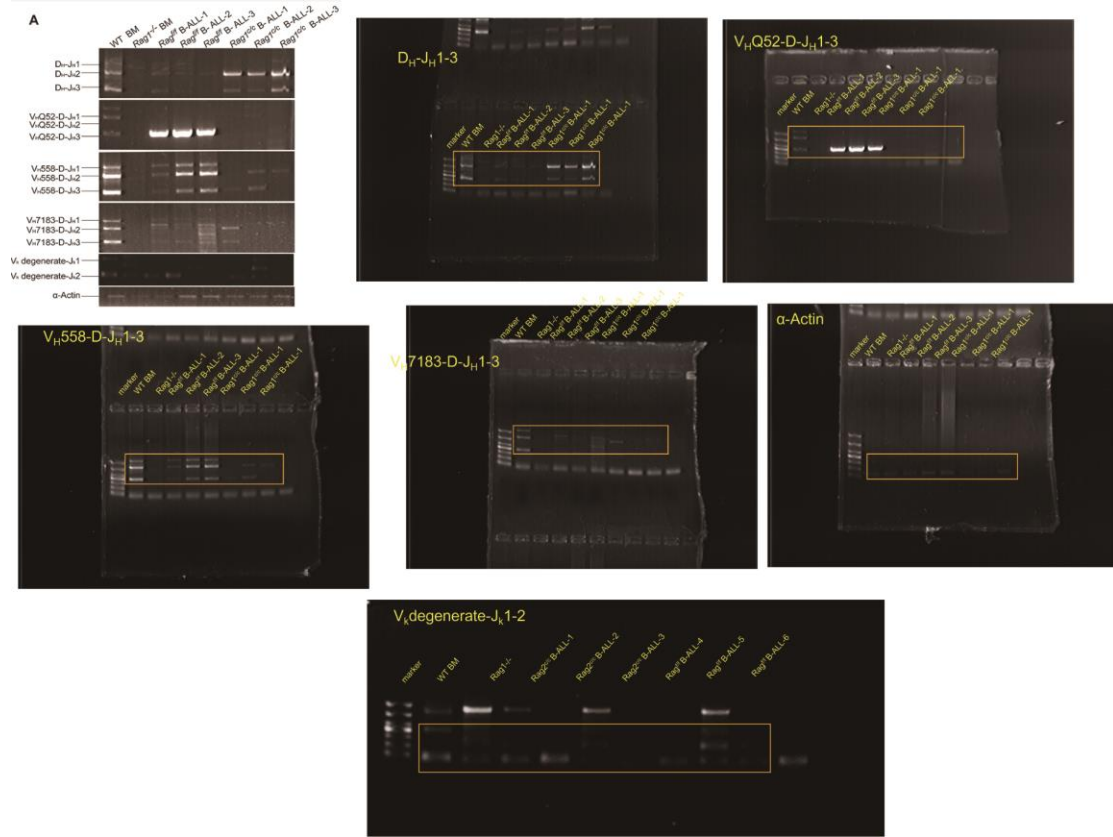

Supplement: fig2-figsupp1-data1 [file elife-91030-fig2-figsupp1-data1-v1.pdf]
