# Supplementary material for: RAG1 and RAG2 non-core regions are implicated in leukemogenesis and off-target V(D)J recombination in BCR-ABL1-driven B-cell lineage lymphoblastic leukemia
Source: eLife journal article supplement (doi:10.7554/elife.91030), 2023-11-01

Figure 3—source data 4

Original file for the Western blot analysis in Figure 3A

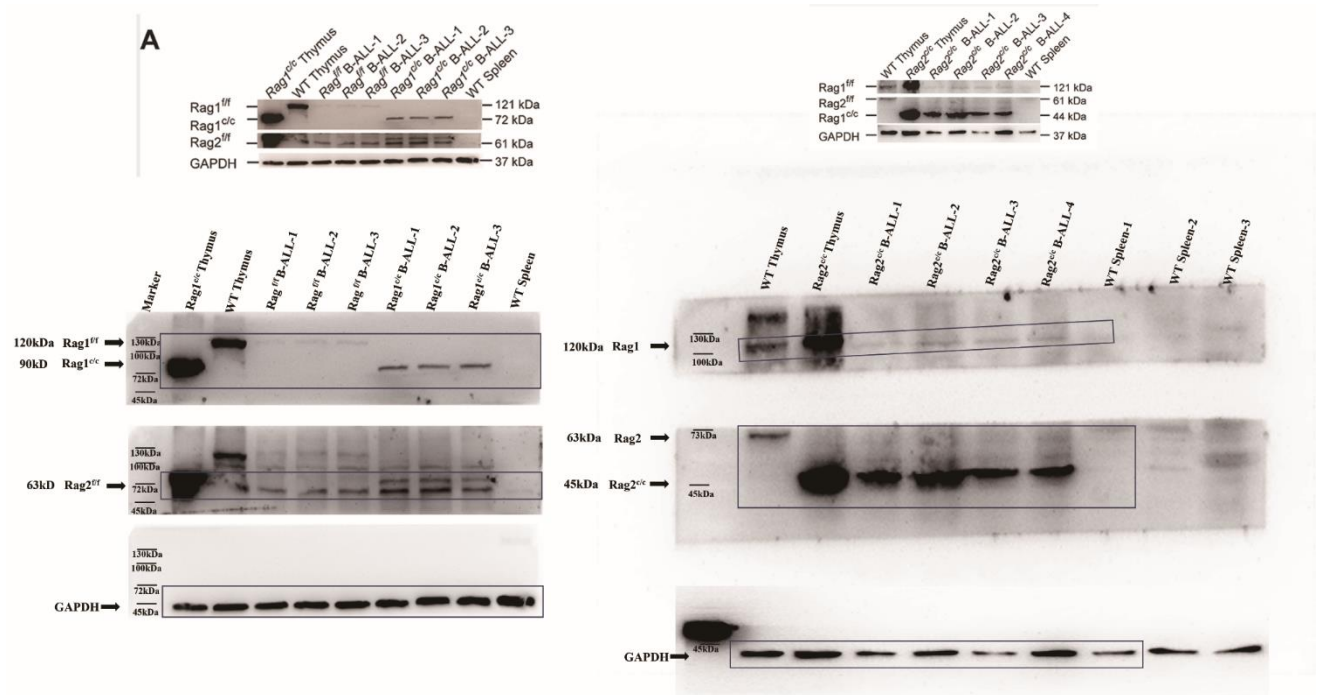

Supplement: fig3-data1 [file elife-91030-fig3-data1-v1.pdf]
