# Supplementary material for: RAG1 and RAG2 non-core regions are implicated in leukemogenesis and off-target V(D)J recombination in BCR-ABL1-driven B-cell lineage lymphoblastic leukemia
Source: eLife. 2024 Jul 26;12:RP91030. doi: 10.7554/eLife.91030 (PMC11281782; doi:10.7554/eLife.91030)
Supplement: Supplementary file 1. [file elife-91030-supp1.xlsx]

## Sheet: Table 1
	Sequencing statistics
	ID	Genotype	Reads(PF)*	Duplicate%	Coverage*
	RAGF/F B-ALL-1F	RAG1，RAG2	633277020	0.1167	26.52
	RAGF/F B-ALL-11F	RAG1，RAG2	636656292	0.1229	26.84
	RAG1C/C B-ALL-3F	RAG1C/C，RAG2	654676424234	0.1725	28.21
	RAG1C/C B-ALL-6F	RAG1C/C，RAG2	653677514	0.1336	27.05
	RAG2C/C B-ALL-3F	RAG1，RAG1C/C	642420178	0.0913	24.22
	RAG2C/C B-ALL-6F	RAG1，RAG1C/C	599211324	0.1648	26.37
	RAG2C/C B-ALL-10F	RAG1，RAG1C/C	646636478	0.1516	25.91
	RAG1C/C B-ALL-Kidney	No cRAG1 and RAG2	532480128	0.2396	19.65
	RAG2C/C B-ALL-Tail	No RAG1 and RAG2	670363136	0.0776	27.35
	RAGF/F B-ALL-Kidney	No RAG1 and RAG2	649172186	0.1203	27.56
	Note:
	*PF=pass quality filter.
	*Coverage was calculated as (#of non-duplicated read pairs) x 2(read length) / (genome size).
